# Supplementary material for: Insight into mechanism and selectivity of propane dehydrogenation over the Pd-doped Cu(111) surface
Source: Royal Society of Chemistry journal article supplement (doi:10.1039/c6ra15038a), 2016-01-01
Supplement: c6ra15038a1.pdf [file c6ra15038a1.pdf]

## Insight into Mechanism and Selectivity of Propane Dehydrogenation over the Pd-Doped Cu(111) Surface

### SUPPORTING INFORMATION

Xinrui Cao<sup>1,2\*</sup>

<sup>1</sup>Department of Physics and Institute of Theoretical Physics and Astrophysics, Xiamen University, Xiamen 361005, China; <sup>2</sup>Fujian Provincial Key Laboratory of Theoretical and Computational Chemistry, Xiamen University, Xiamen 361005, China;

**Table S1.** Energy barriers for propane/propylene dehydrogenation on pure and Pd-doped Cu(111) surfaces with the van der Waals correction by vdW-DF functional.

| Surfaces                | a    | b    | c    | d    | e    |
|-------------------------|------|------|------|------|------|
| <b>step1 (kcal/mol)</b> | 38.8 | 34.6 | 33.8 | 31.5 | 30.6 |
| <b>Step2 (kcal/mol)</b> | 36.9 | 32.9 | 31.4 | 30.5 | 28.7 |
| <b>Step3 (kcal/mol)</b> |      | 1.8  | 1.8  | 2.0  | 4.7  |
| <b>Step4 (kcal/mol)</b> |      | 2.3  | 2.0  | 1.6  | 3.7  |
| <b>Step5 (kcal/mol)</b> |      | 20.7 | 21.5 | 21.1 | 21.4 |
| <b>Step6 (kcal/mol)</b> |      | 20.6 | 20.8 | 21.1 | 20.7 |
| <b>Step7 (kcal/mol)</b> |      | 38.2 | 37.8 | 37.2 | 36.0 |
| <b>Step8 (kcal/mol)</b> |      | 38.7 | 38.1 | 37.3 | 36.0 |
| <b>Step9 (kcal/mol)</b> |      | 65.1 | 64.3 | 63.2 | 63.3 |
